# Supplementary material
Source: PubMed Central journal article supplement (PMC5407727)
Supplement: ASN.2016070731SupplementaryData.pdf [file ASN.2016070731SupplementaryData.pdf]

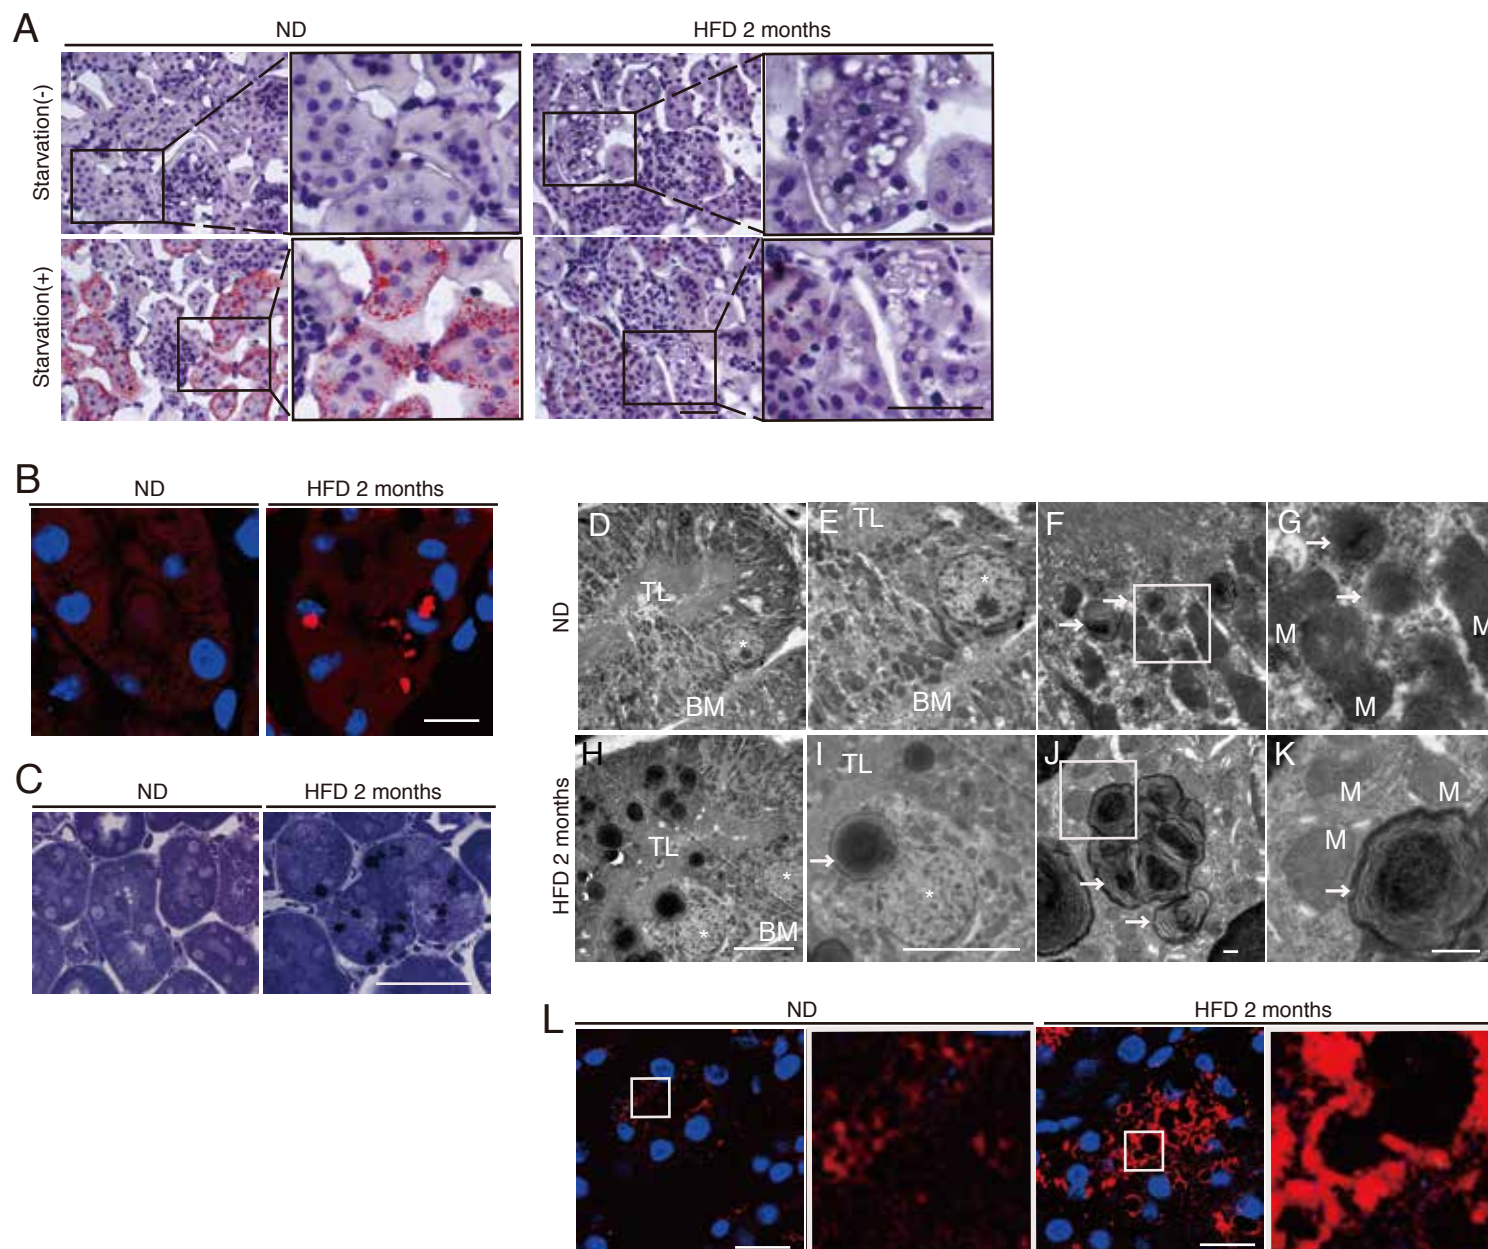

### Supplementary Figure 1. HFD promotes phospholipid accumulation in the lysosome of the proximal tubules

(A) Oil Red O-stained kidney cortical regions of *nonobese* or *obese* mice that were either fed or subjected to 24 hours of starvation ( $n = 6-9$  in each group). Counterstaining was performed with hematoxylin. (B and C) Nile red (B) and toluidine blue (C) stainings of the kidney cortical regions of *nonobese* or *obese* mice ( $n = 5$  in each group). (D-K) Electron micrographs of *nonobese* (D-G) and *obese* mice (H-K) ( $n = 3$  in each group). BM, basement membrane; TL, tubular lumen; M, mitochondria; arrow, lysosome, \*, nucleus. Magnified images of lysosomes and mitochondria are presented. (L) Kidney sections were immunostained for LAMP1, a marker of lysosomes (red), and counterstained with DAPI (blue) ( $n = 5$  in each group). Images are representative of multiple experiments. Bars: 50  $\mu\text{m}$  (A and C), 10  $\mu\text{m}$  (B, D, H, and L), and 500 nm (E-G and I-K). Values represent the mean  $\pm$  SE. Statistically significant differences ( $*P < 0.05$  vs. treatment-matched *Atg5<sup>F/F</sup>* control littermates;  $\#P < 0.05$  vs. *nonobese* mice) are indicated. F/F, *Atg5<sup>F/F</sup>* mice; F/F;KAP, *Atg5<sup>F/F</sup>*;KAP mice.

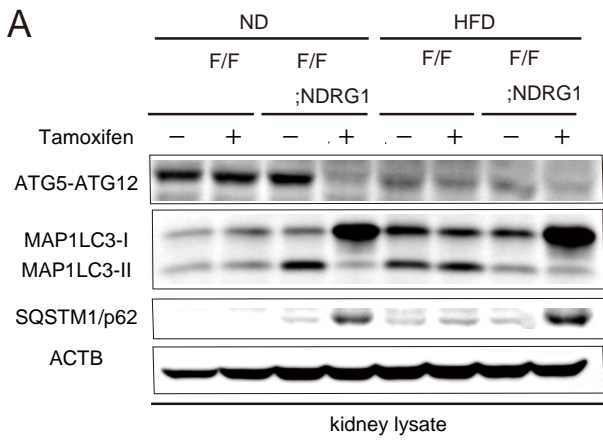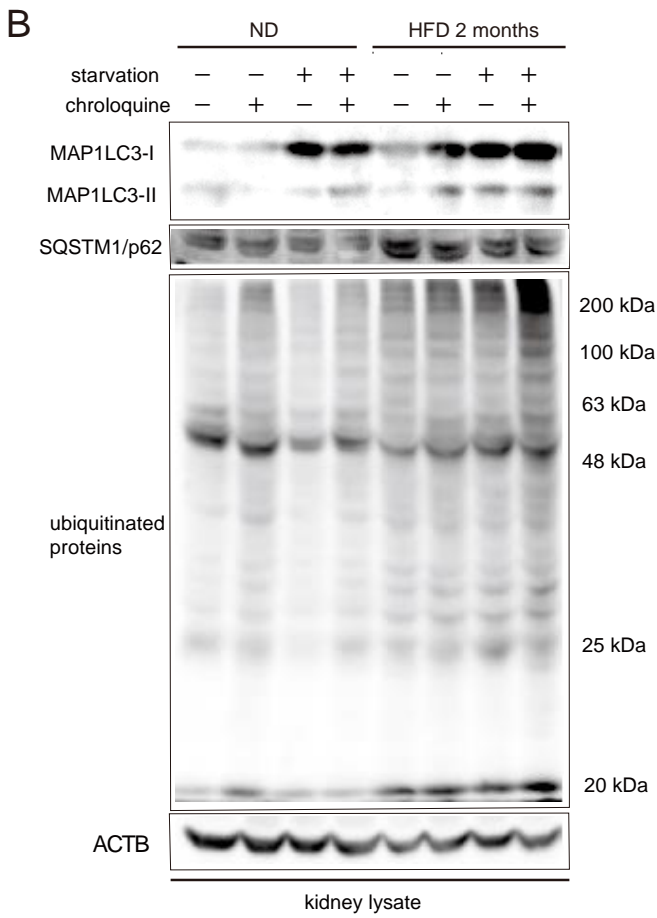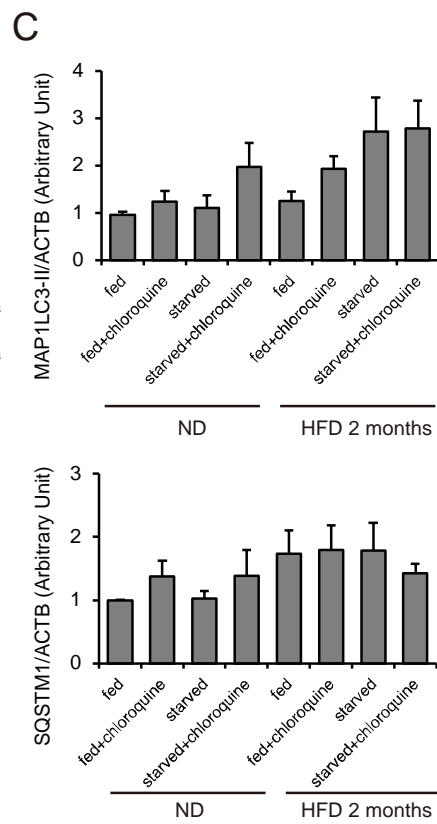

**Supplemental Figure 2. Western blot analysis using whole kidney lysates of *nonobese* or *obese Atg5<sup>F/F</sup>-NDRG1* and *Atg5<sup>F/F</sup>* control mice, and GFP-MAP1LC3 transgenic mice**

(A) Western blot analysis using whole kidney lysates of *nonobese* or *obese Atg5<sup>F/F</sup>-NDRG1* and *Atg5<sup>F/F</sup>* control mice. Autophagy-deficiency was confirmed by the reduction of Atg5 expression, blockage of conversion of MAP1LC3-I to MAP1LC3-II, and the accumulation of SQSTM1/p62 in the kidney cortexes of *nonobese* or *obese Atg5<sup>F/F</sup>-NDRG1* mice treated with tamoxifen (n = 4 or 5 in each group). (B) Western blot analysis using whole kidney lysates of *nonobese* or *obese GFP-MAP1LC3* transgenic mice that were either fed or subjected to 24 hours of starvation, with or without chloroquine administration (n = 6-9 in each group). A representative immunoblot (B) and quantification by densitometry (C) of HFD-mediated alterations in protein levels of MAP1LC3, SQSTM1/p62, and ubiquitinated proteins are shown. The mean value of fed young control mice without chloroquine administration was adjusted to “1” as a reference (C). Data are provided as mean  $\pm$  SE. Statistically significant differences (\*, P < 0.05) are indicated. ACTB was used as loading control. F/F, *Atg5<sup>F/F</sup>* mice; F/F;NDRG1, *Atg5<sup>F/F</sup>-NDRG1* mice.

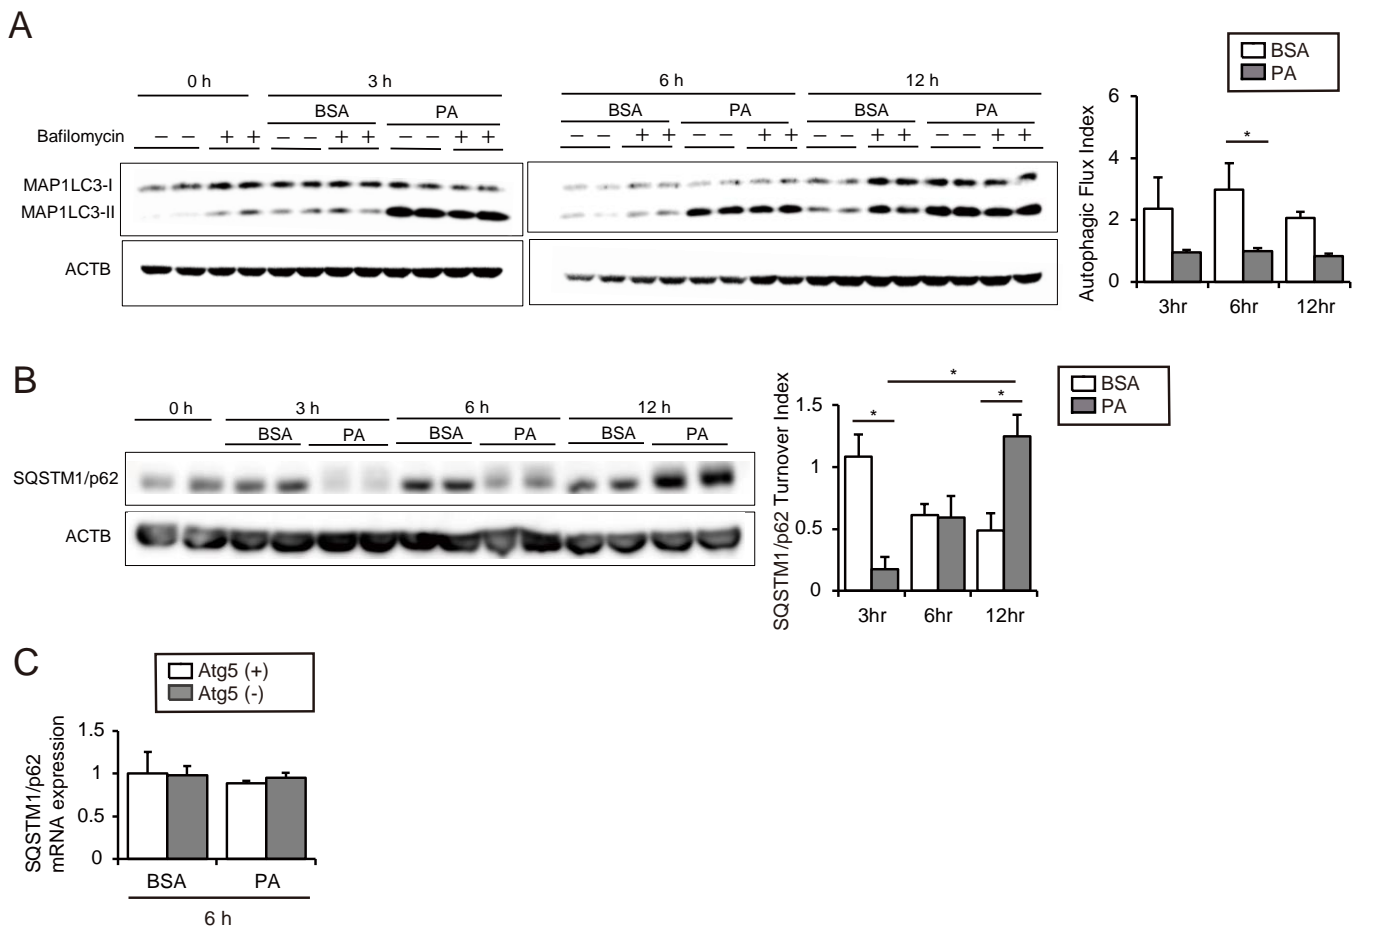

### Supplementary Figure 3. PA affects autophagic activity in the PTCs

Autophagic flux in the PTCs during BSA or PA overload was estimated by the conversion from MAP1LC3-I to MAP1LC3-II as a readout of autophagosome formation and by the SQSTM1/p62 degradation assay at the indicated times ( $n = 4-5$ , respectively). (A and B) Western blot analysis of MAP1LC3 (A) and SQSTM1/p62 (B). Autophagic flux index (A) (defined as the proportion of the levels of MAP1LC3-II in the presence of bafilomycin A1 to the levels of MAP1LC3-II in the absence of bafilomycin A1) and SQSTM1/p62 turnover index (B) (defined as the proportion of the levels of SQSTM1/p62 of indicated sample to the levels of SQSTM1/p62 of untreated controls at the baseline) are shown. (C) Messenger RNA expression levels of SQSTM1/p62 were assessed in autophagy-competent and -deficient PTCs treated with either 0.25 % BSA or 0.25 mM PA for 6 hours ( $n = 3$ ). All images are representative of multiple experiments. Data are provided as mean  $\pm$  SE. Statistically significant differences ( $*P < 0.05$ ) are indicated. Atg5(+), autophagy-competent PTC; Atg5(-), autophagy-deficient PTC.

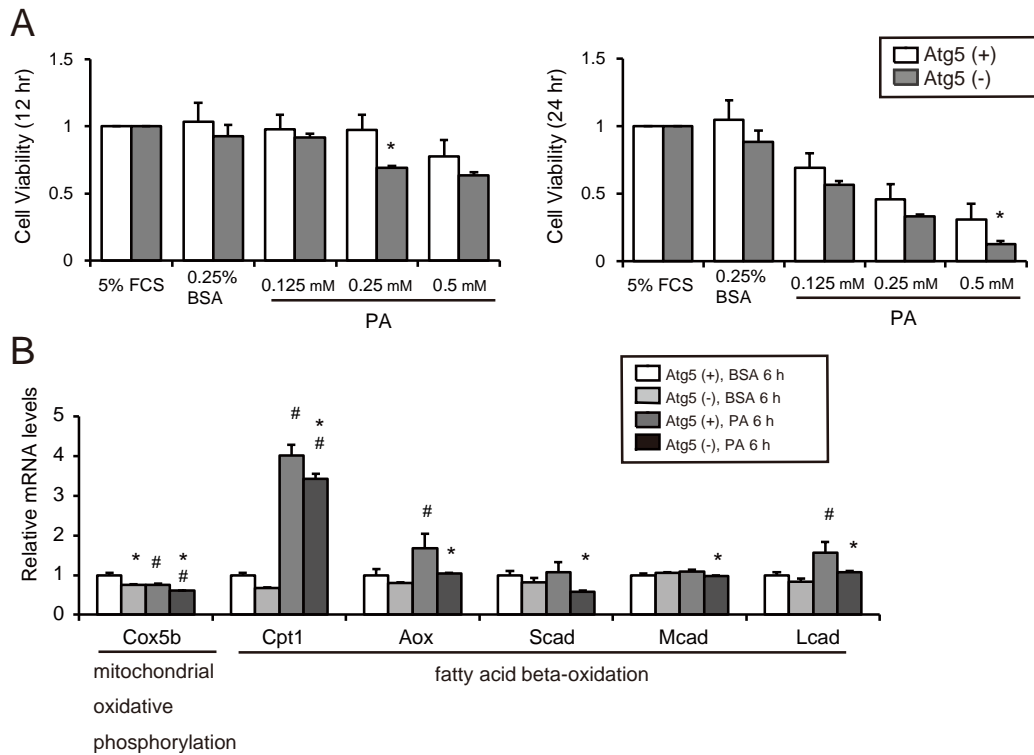

### Supplementary Figure 4. Autophagy protects PTCs during PA overload

(A) Cell survival of autophagy-competent and -deficient PTCs incubated with the indicated concentrations of FBS, BSA, or PA for 12 or 24 hours. (B) Messenger RNA expression levels of mitochondrial oxidative phosphorylation-, and FA b-oxidation-genes were assessed in autophagy-competent and -deficient PTCs treated with either 0.25 % BSA or 0.25 mM PA for 6 hours ( $n = 6$ ). Data are provided as mean  $\pm$  SE. Statistically significant differences ( $*P < 0.05$  vs. autophagy-competent cells of corresponding treatment;  $\#P < 0.05$  vs. BSA-treated control cells) are indicated. Atg5(+), autophagy-competent PTC; Atg5(-), autophagy-deficient PTC.

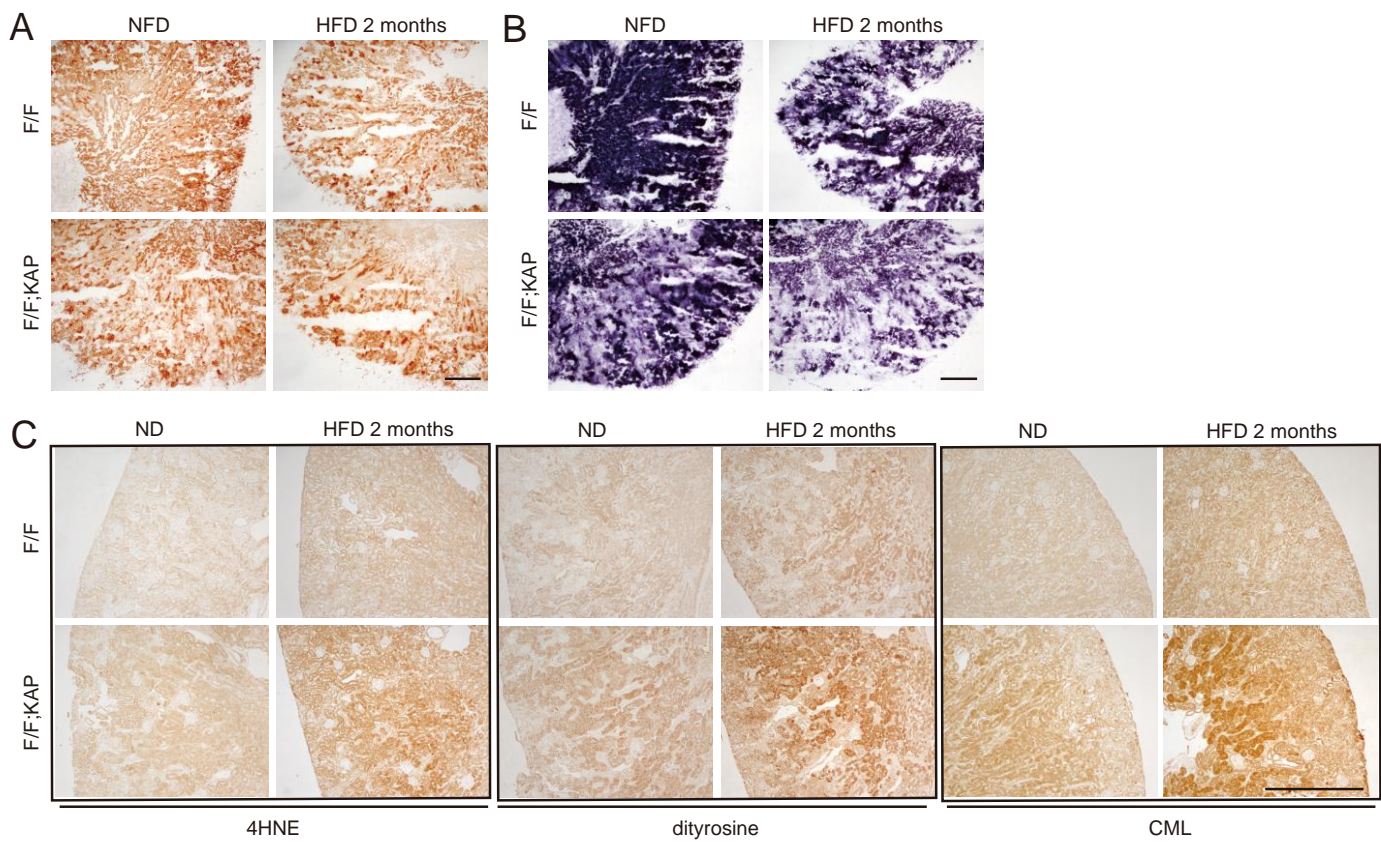

### Supplementary Figure 5. Autophagy deficiency aggravates HFD-induced mitochondrial dysfunction

(A and B) Representative images of COX (A) and SDH (B) stainings and immunostaining of oxidative stress indicators, including 4-HNE, dityrosine, and CML (C) in the kidney cortical regions of *nonobese* and *obese*  $Atg5^{F/F}$  and  $Atg5^{F/F};KAP$  mice (n = 5 (A and B) and 7 (C) in each group). Bars: 500  $\mu$ m. F/F,  $Atg5^{F/F}$  mice; F/F;KAP,  $Atg5^{F/F};KAP$  mice.

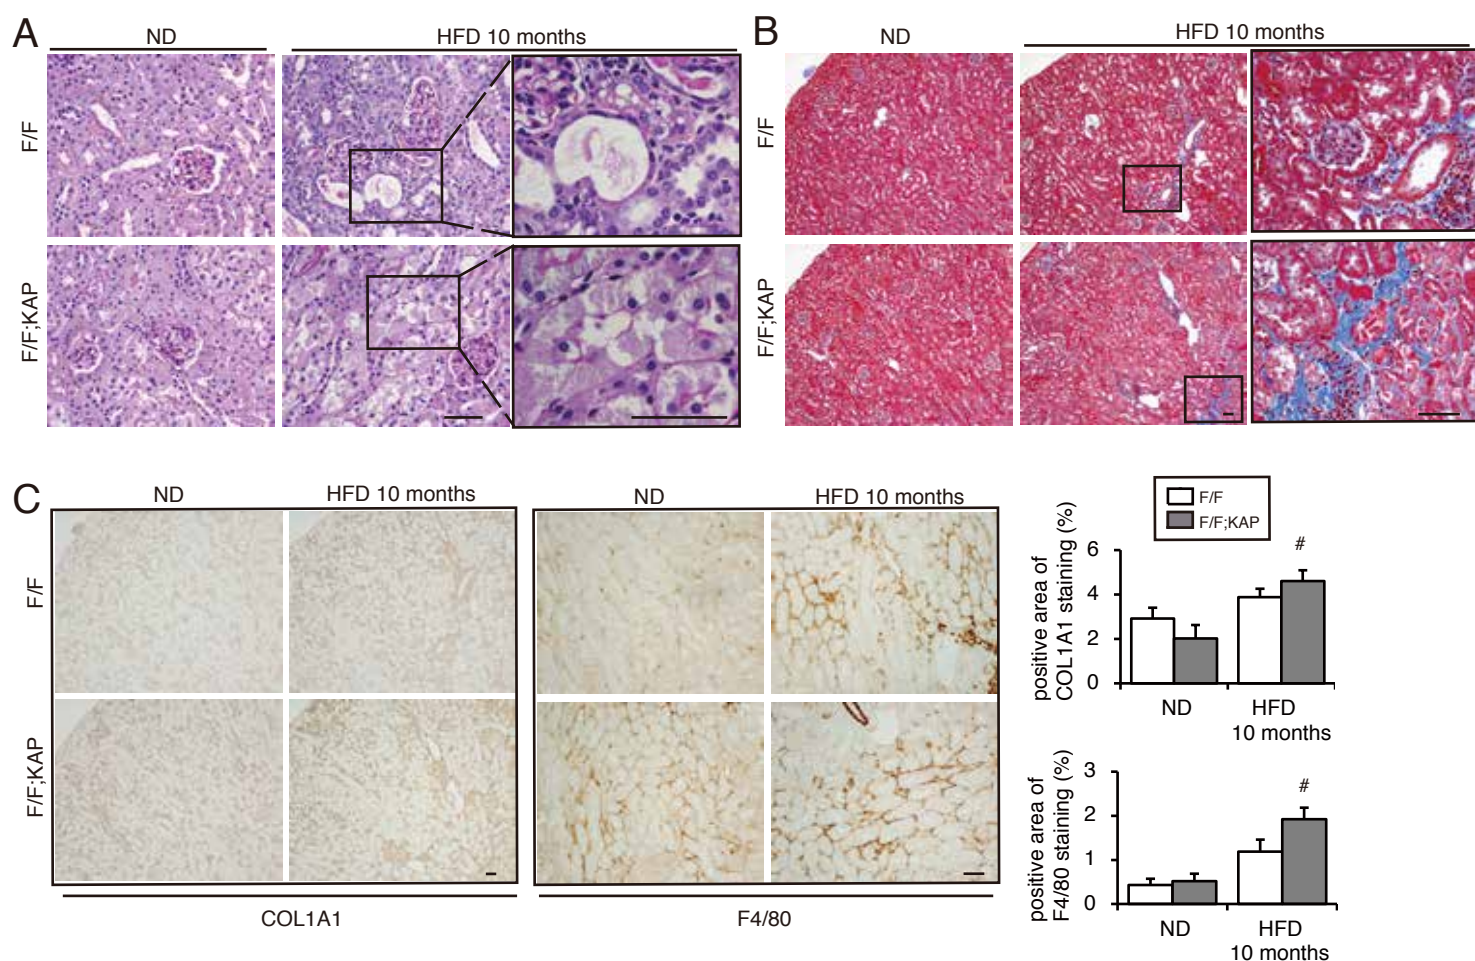

### Supplementary Figure 6. Prolonged HFD induces macrophage infiltration and fibrosis in the autophagy-deficient kidney

(A-C) PAS-staining (A), Masson trichrome staining (B) and immunostaining for collagen type I and F4/80 (C) in kidney cortical regions of *Atg5<sup>F/F</sup>* and *Atg5<sup>F/F</sup>;KAP* mice fed an HFD for up to 10 months ( $n = 7-10$  in each group). (A) Magnified images from *obese* mice are presented. (C) The proportion of the immune-positive area for collagen type I and F4/80 was quantified in at least 10 high-power fields ( $\times 400$ ). All images are representative of multiple experiments. Bars: 50  $\mu\text{m}$ . Values represent the mean  $\pm$  SE. Statistically significant differences ( $*P < 0.05$  vs. treatment-matched *Atg5<sup>F/F</sup>* control littermates;  $\#P < 0.05$  vs. nonobese mice) are indicated. F/F, *Atg5<sup>F/F</sup>* mice; F/F;KAP, *Atg5<sup>F/F</sup>;KAP* mice.

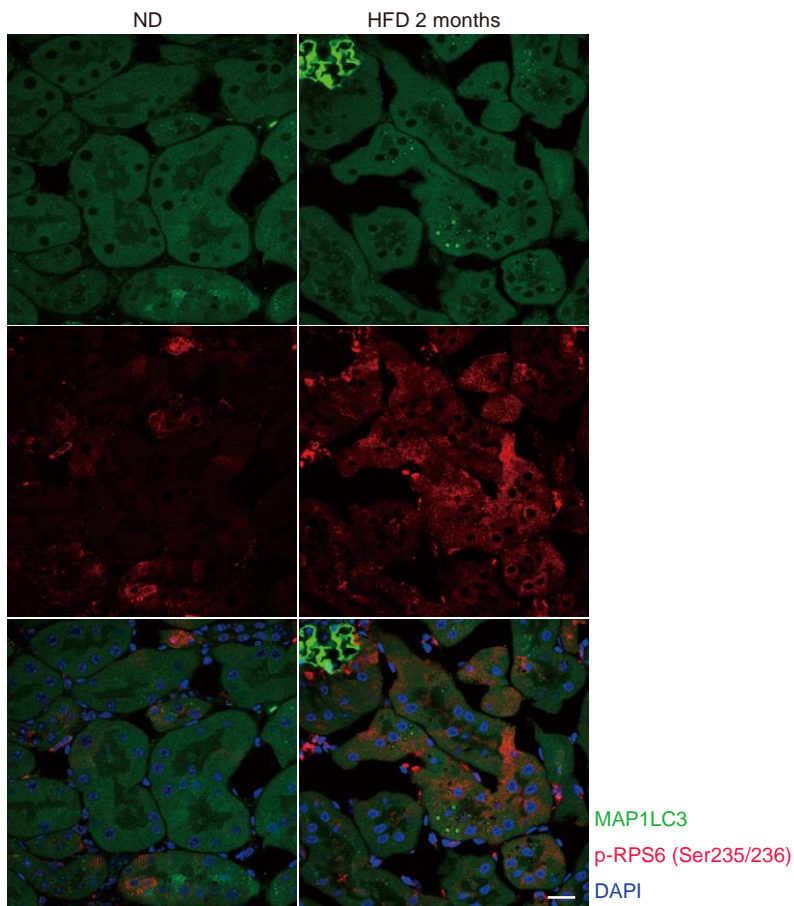

**Supplemental Figure 7. Immunofluorescence analysis of p-RPS6 (Ser235/236), a marker for mTORC1 activation, in the kidney cortical regions of *nonobese* or *obese* GFP-MAP1LC3 transgenic mice**

Relation between GFP-positive puncta formation and mTORC1 signal was assessed in the proximal tubules of *nonobese* or *obese* GFP-MAP1LC3 transgenic mice (n = 3). Kidney sections were immunostained for p-RPS6 (Ser235/236), a marker for mTORC1 activation and counterstained with DAPI (blue). Bar: 20  $\mu$ m.



|                            | No | BMI  | Diagnosis              | Age | Gender | Urinary protein excretion<br>(g/day) | Serum creatinine<br>(mg/dl) |
|----------------------------|----|------|------------------------|-----|--------|--------------------------------------|-----------------------------|
| obese patients<br>(n=5)    | 1  | 30.4 | Interstitial Nephritis | 53  | F      | 0.57                                 | 1.30                        |
|                            | 2  | 31.2 | IgA Nephropathy        | 46  | M      | 1.73                                 | 1.01                        |
|                            | 3  | 39.7 | FSGS                   | 19  | M      | 6.77                                 | 1.39                        |
|                            | 4  | 33.6 | Diabetic Nephropathy   | 57  | F      | 5.49                                 | 0.86                        |
|                            | 5  | 31.3 | IgA Nephropathy        | 42  | F      | 4.62                                 | 0.87                        |
| nonobese patients<br>(n=5) | 6  | 24.4 | IgA Nephropathy        | 52  | M      | 1.79                                 | 1.13                        |
|                            | 7  | 20.2 | MCNS                   | 32  | M      | 5.82                                 | 1.32                        |
|                            | 8  | 21.5 | MCNS                   | 25  | F      | 4.14                                 | 0.59                        |
|                            | 9  | 24.0 | Nephrosclerosis        | 49  | M      | 4.42                                 | 1.99                        |
|                            | 10 | 21.3 | IgA Nephropathy        | 33  | F      | 0.55                                 | 0.58                        |

**Supplemental Table 1. Clinical characteristics of obese and nonobese patients**

Clinical characteristics of obese and nonobese cases with chronic kidney diseases (n = 5, respectively) are shown. BMI, Body mass index; FSGS, focal segmental glomerulosclerosis; MCNS, minimal change nephrotic syndrome.
